# Supplementary material
Source: Springer Nature journal article supplement (https://www.springermedizin.de/resource/supplementary/12985_2011_1928_MOESM4_ESM.pdf/9610736)

**A****1****2****M**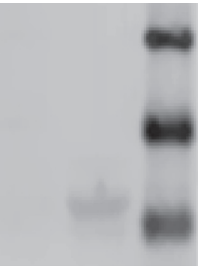**kD****34****26****B****1****2****M**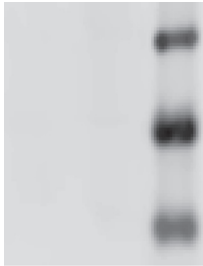**kD****34****26**

Supplement: MOESM4 [file 9610736]
